# Supplementary material for: Identifying global expression patterns and key regulators in epithelial to mesenchymal transition through multi-study integration
Source: PubMed Central journal article supplement (PMC5485747; doi:10.1186/s12885-017-3413-3), 2017-06-26
Supplement: 12885_2017_3413_MOESM9_ESM.pdf [file 12885_2017_3413_MOESM9_ESM.pdf]

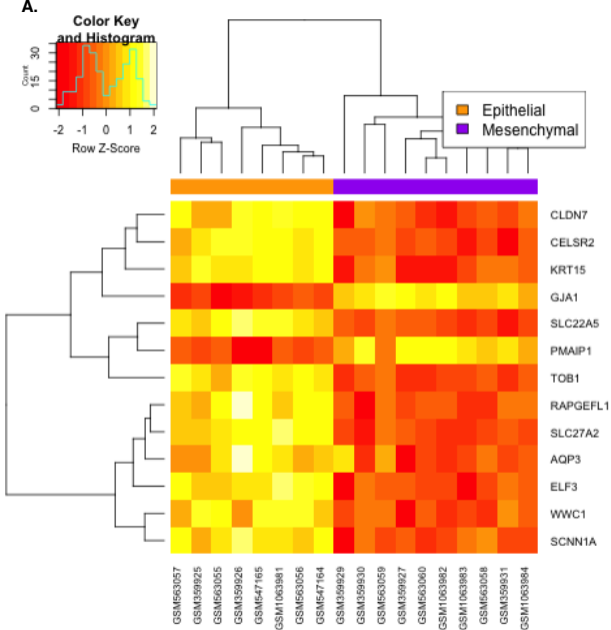

Estrogen Response genes: early (prostate samples)

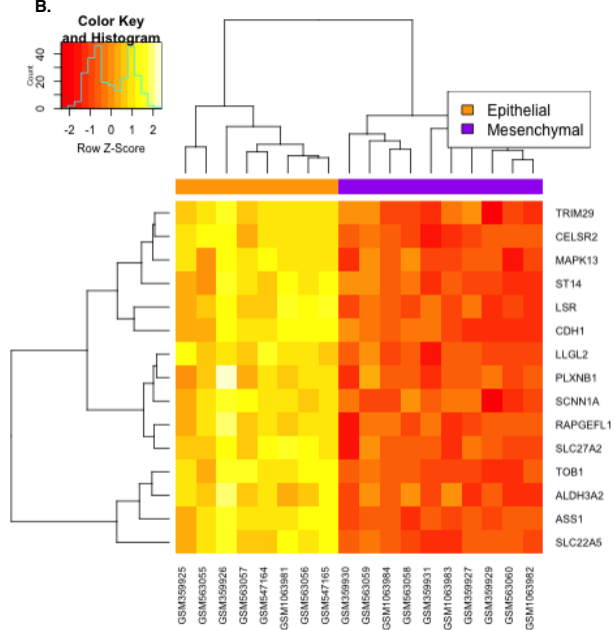

Estrogen Response genes: late (prostate samples)
