# Supplementary material for: Identifying global expression patterns and key regulators in epithelial to mesenchymal transition through multi-study integration
Source: PubMed Central journal article supplement (PMC5485747; doi:10.1186/s12885-017-3413-3), 2017-06-26

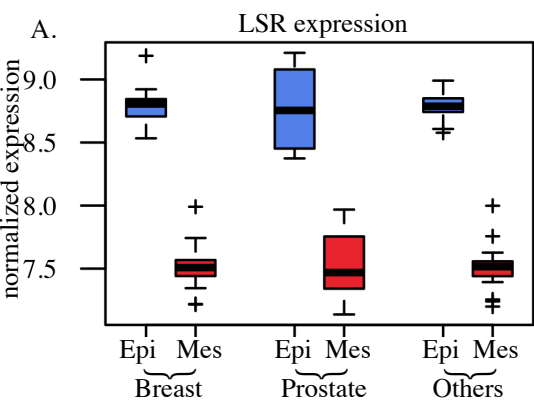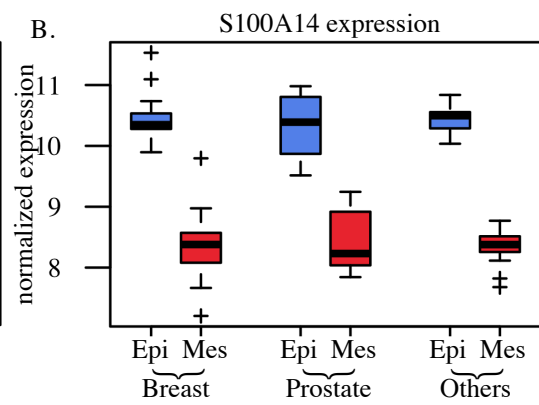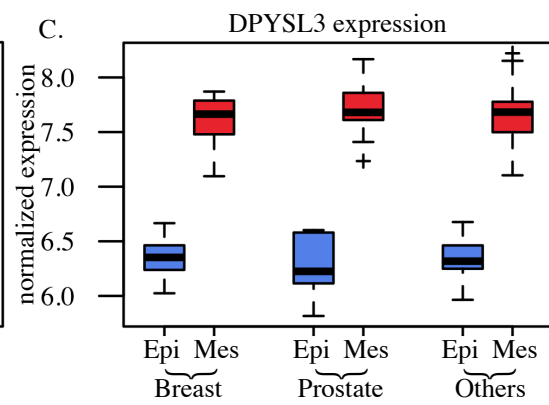

Supplement: 12885_2017_3413_MOESM12_ESM.pdf [file 12885_2017_3413_MOESM12_ESM.pdf]
