# Supplementary material for: Identifying global expression patterns and key regulators in epithelial to mesenchymal transition through multi-study integration
Source: BMC Cancer. 2017 Jun 26;17:447. doi: 10.1186/s12885-017-3413-3 (PMC5485747; doi:10.1186/s12885-017-3413-3)
Supplement: Supplementary file 14 — C1orf116 module genes obtained from Weighted Gene Co-expression analysis. (XLSX 42 kb) [file 12885_2017_3413_MOESM14_ESM.xlsx]

## Sheet: c1orf116_module_genes
Gene	spearman rho	p-value	bonferroni adjusted
S100A14	0.601344	0	0
VAMP8	0.594625	0	0
SLC2A9	0.571973	0	0
RAB25	0.540426	0	0
MST1R	0.522343	0	0
MPZL2	0.511758	0	0
CDH1	0.505487	0	0
SPINT1	0.497256	0	0
ST14	0.48981	0	0
MAPK13	0.483987	0	0
PRSS8	0.479059	0	0
CDS1	0.433371	0	0
CXCL3	0.431579	0	0
CLDN7	0.406856	0	0
STAP2	0.393773	0	0
AP1M2	0.389026	0	0
TOB1	0.37514	0	0
MAP7	0.368869	0	0
SCNN1A	0.318701	0	0
SH2D3A	0.303471	0	0
EPB41L4B	0.284658	0	0
LSR	0.26271	0	0
ZEB2	0.256439	0	0
CD59	0.247032	0.001	0.037
NCAM1	0.192833	0.006	0.222
SMURF2	0.157447	0.012	0.444
CEBPA	0.146697	0.07	1
CYR61	0.140426	0.038	1
GRB7	0.13953	0.075	1
COL6A1	0.138634	0.196	1
CXADR	0.118925	0.081	1
CLN3	0.0978723	0.296	1
LLGL2	0.0732363	0.369	1
EPB41L3	0.0663008	0.416	1
COL5A1	0.019498	0.999	1
FERMT2	0.0055991	0.712	1
CTGF	0.000223964	0.792	1
